# Supplementary material for: Nanostructural control of cup-stacked carbon nanotubes with 1-benzyl-1,4-dihydronicotinamide dimer via photoinduced electron transfer
Source: Royal Society of Chemistry journal article supplement (doi:10.1039/b614181a), 2006-11-15
Supplement: b614181a.pdf [file b614181a.pdf]

## Electronic Supplementary Information

### **Nanostructural Control of Cup-Stacked Carbon Nanotubes with 1-Benzyl-1,4-dihydronicotinamide Dimer via Photoinduced Electron Transfer**

Kenji Saito, Masataka Ohtani, and Shunichi Fukuzumi\*

*Department of Material and Life Science, Graduate School of Engineering, Osaka University, SORST, Japan Science and Technology Agency (JST), Suita, Osaka 565-0871, Japan*

\* To whom correspondence should be addressed

E-mail: fukuzumi@chem.eng.osaka-u.ac.jp

S1

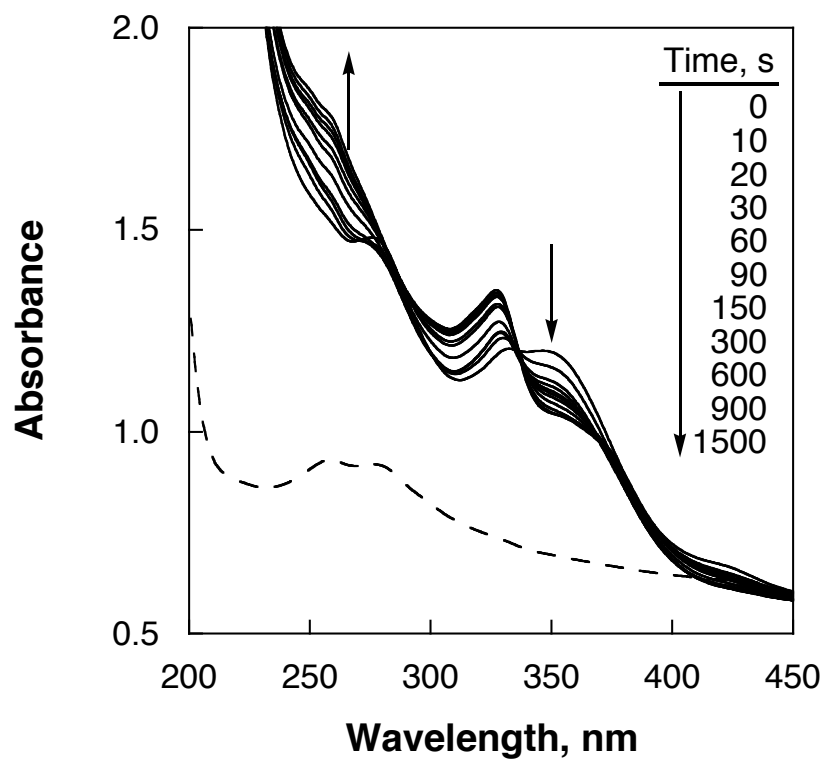

**Fig. S1** UV-vis absorption spectral change in the photoreduction of CSCNTs with  $(\text{BNA})_2$  in deaerated MeCN (solid lines). The dashed line represents the absorption of CSCNTs.

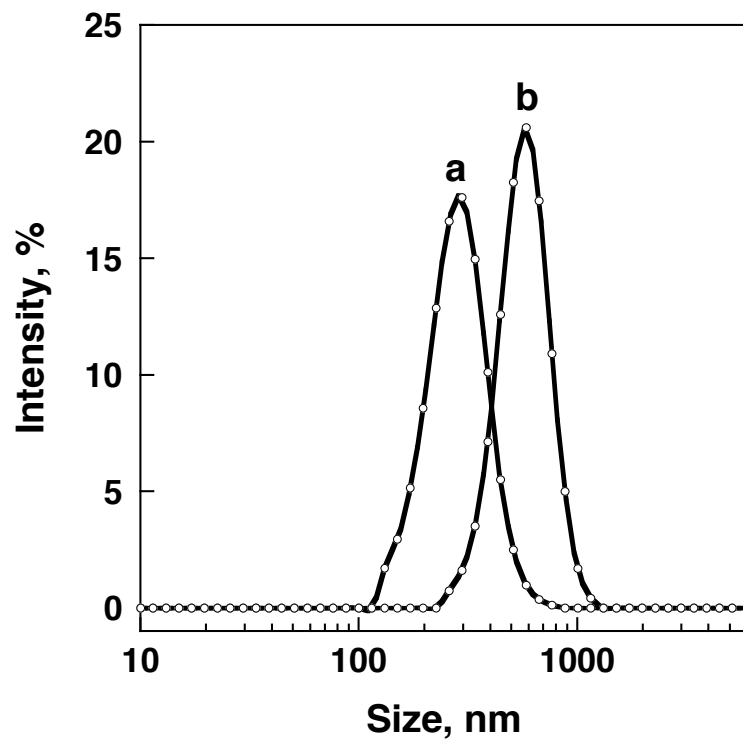

**Fig. S2** Size distribution diagrams of (a) reduced CSCNTs in deaerated MeCN and (b) recovered CSCNTs after oxidation by oxygen in air-saturated MeCN.
